# Supplementary material for: Postoperative non‐steroidal anti‐inflammatory drugs and anastomotic leakage after gastrointestinal anastomoses: Systematic review and meta‐analysis
Source: PubMed Central journal article supplement (PMC6992684; doi:10.1002/ags3.12300), 2019-12-02

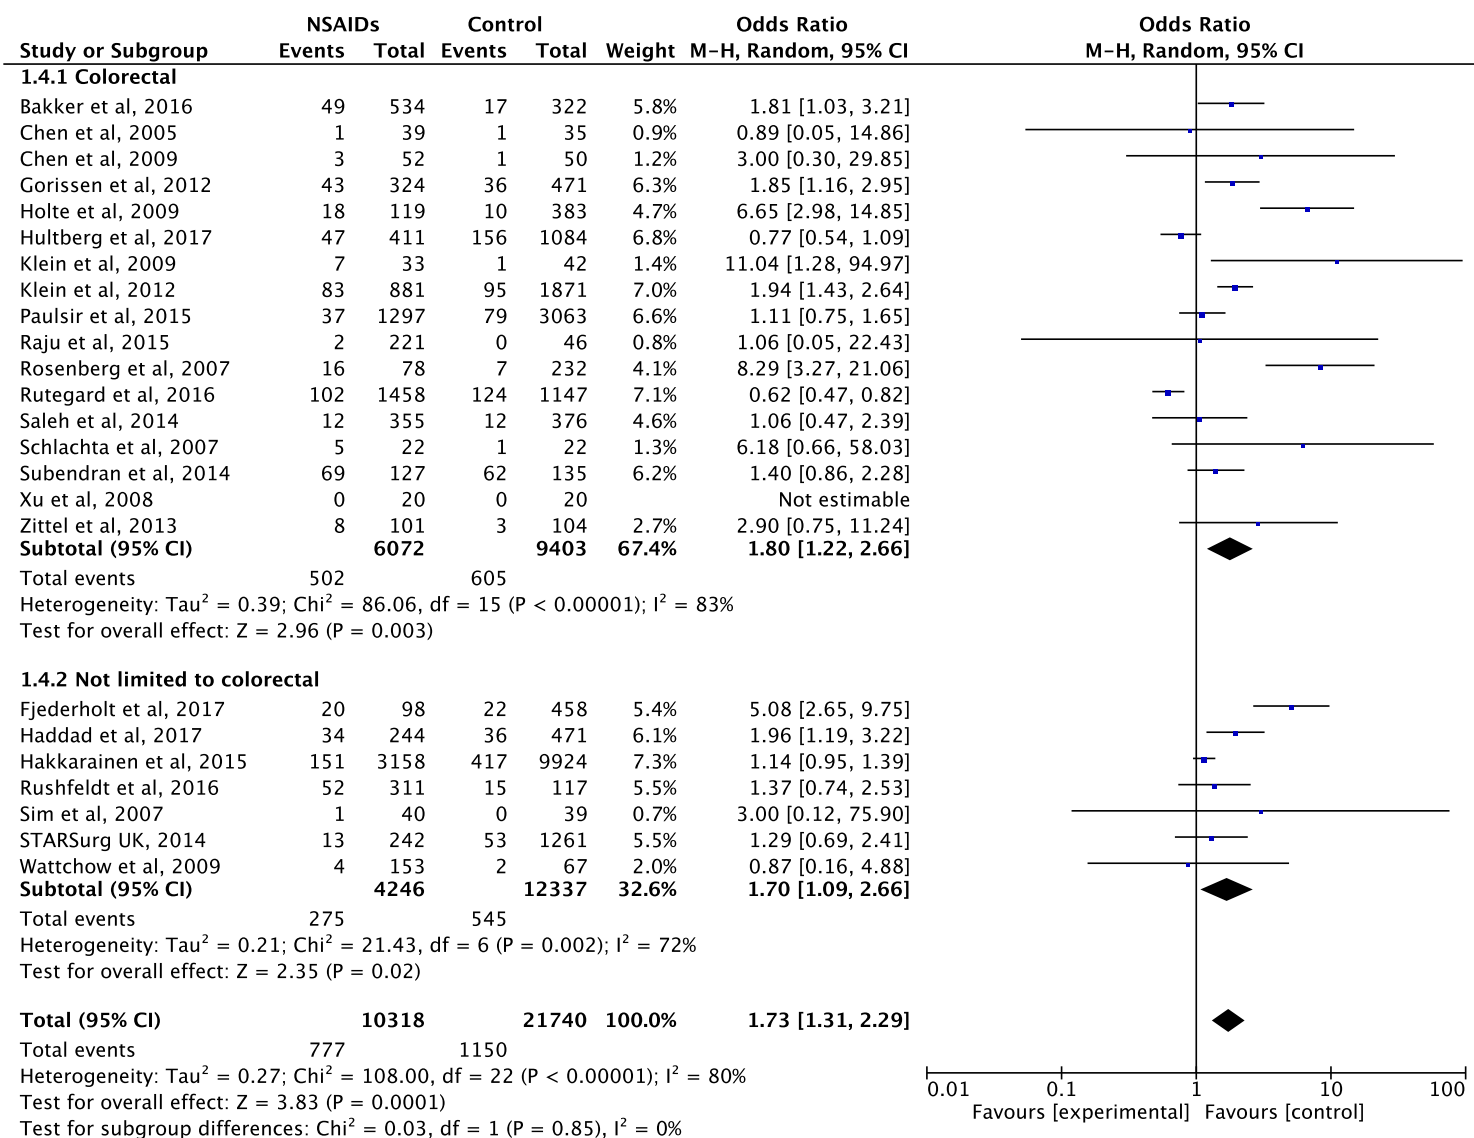

Supplement: AGS3-4-64-s001.pdf [file AGS3-4-64-s001.pdf]
